# Supplementary material
Source: publisher figshare collection journal article supplement (https://karger.figshare.com/ndownloader/files/28959717)
Supplement: Supplementary file 1 [file 28959717]

**Figure S1**

A. Relative expression of H19 in GC with different individual stage. B. QPCR analysis of H19 in GC cells transfected with control vector or H19-overexpression vector. C. QPCR analysis of H19 in GC cells transfected with shCtrl or shH19. D. Western blot analysis was used to determine the phosphorylation levels of Smad2 and Smad3 in GC cells transfected with shCtrl or shH19. *P<0.05; **P<0.01; ***P<0.001.
